# Supplementary material for: Cholinergic System and NGF Receptors: Insights from the Brain of the Short-Lived Fish Nothobranchius furzeri
Source: Brain Sci. 2020 Jun 20;10(6):394. doi: 10.3390/brainsci10060394 (PMC7348706; doi:10.3390/brainsci10060394)
Supplement: Supplementary file 1 [file brainsci-10-00394-s001.pdf]

# Supplementary Materials: Cholinergic System and NGF Receptors: Insights from the Brain of the Short-Lived Fish *Nothobranchius furzeri*

Paolo de Girolamo <sup>1,\*</sup>, Adele Leggieri <sup>1</sup>, Antonio Palladino <sup>2</sup>, Carla Lucini <sup>1</sup>, Chiara Attanasio <sup>1</sup> and Livia D'Angelo <sup>1</sup>

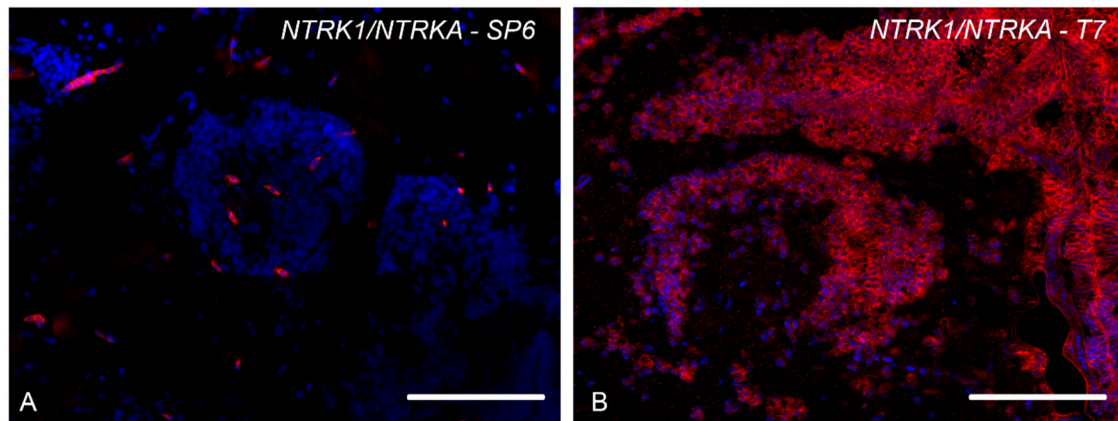

**Figure S1:** Sense and antisense probe showing the absence of signal in sense probe. Transverse section of the glomerular nucleus showing in (A) the absence of staining in the glomerular nucleus and diencephalon with the sense probe (SP6) against NTRK1/NTRKA in young animals; (B) the NTRK1/NTRKA labeling with antisense probe (T7) in the same brain area of young animals. Scale bar = 50 $\mu$ .
